# Supplementary material for: Exome Analysis of Two Limb-Girdle Muscular Dystrophy Families: Mutations Identified and Challenges Encountered
Source: PLoS One. 2012 Nov 14;7(11):e48864. doi: 10.1371/journal.pone.0048864 (PMC3498247; doi:10.1371/journal.pone.0048864)
Supplement: Table S1 — Quality metrics for exomes of affected individuals in LGMD2359 and LGMD2692. PF = passes Illumina filter # PF bases aligned = the number of bases in the PF aligned reads that are mapped to a reference base. %PF aligned bases on or near bait = On+Near Bait Bases/PF Bases Aligned. (XLSX) [file pone.0048864.s001.xlsx]

## Sheet: Sheet1
Table S1. Quality metrics for exomes of affected individuals in LGMD2359 and LGMD2692.
Sample ID	% Reads aligned	% Duplicate reads	# PF bases aligned	% PF aligned bases on or near bait	Mean reads/base	% Target at ≥10X	Mean insert size (std dev)
2359/II:2	0.9563	0.1321	5043222990	87.1817	53.24	88.8	319.30886 (37.969111)
2359/II:7	0.9816	0.1634	5519711918	86.7128	57.74	89.9	319.831054 (37.673408)
2359/III:4	0.961	0.189	4540062271	88.271	50.03	89	302.01598 (31.209178)
2692/II:3	0.9712	0.0813	4796579773	88.8778	50.97	89.1	330.872898 (36.020281)
2692/II:8	0.9641	0.0629	4041676495	84.5324	41.99	85.7	317.925214 (43.743012)
PF= passes Illumina filter
# PF bases aligned= the number of bases in the PF aligned reads that are mapped to a reference base.
%PF aligned bases on or near bait= On+Near Bait Bases / PF Bases Aligned.
